# Supplementary material
Source: PubMed Central journal article supplement (PMC7966577)
Supplement: 3855_table.pdf [file 3855_table.pdf]

**On-line Table: Baseline characteristics of the patients<sup>a</sup>**

| Outcome                                                                        | Entire Cohort<br>(N = 202) | Studied Cohort<br>(n = 196) | SPAN-100-Positive<br>(n = 15) | SPAN-100-Negative<br>(n = 181) |
|--------------------------------------------------------------------------------|----------------------------|-----------------------------|-------------------------------|--------------------------------|
| Median age (yr, range)                                                         | 72 (25, 86)                | 72 (25, 86)                 | 80 (76, 86)                   | 70 (25, 84)                    |
| Age categories (n/N)                                                           |                            |                             |                               |                                |
| <65 yr                                                                         | 27% (54/202)               | 27% (53/196)                | 0% (0/15)                     | 29% (53/181)                   |
| 65–79 yr                                                                       | 59% (119/202)              | 59% (115/196)               | 40% (6/15)                    | 60% (109/181)                  |
| ≥80 yr                                                                         | 14% (29/202)               | 14% (28/196)                | 60% (9/15)                    | 10% (19/181)                   |
| Sex, female (n/N)                                                              | 60% (122/202)              | 60% (117/196)               | 67% (10/15)                   | 59% (107/181)                  |
| Median NIHSS score (range)                                                     | 17 (8, 26)                 | 17 (8, 26)                  | 23 (18, 26)                   | 16 (8, 26)                     |
| Median ASPECTS (range)                                                         | 8 (3, 10)                  | 8 (3, 10)                   | 8 (5, 9)                      | 8 (3–10)                       |
| ASPECTS categories (n/N)                                                       |                            |                             |                               |                                |
| ≤5                                                                             | 13% (25/199)               | 12% (24/193)                | 14% (2/14)                    | 12% (22/179)                   |
| 6–10                                                                           | 87% (174/199)              | 88% (169/193)               | 86% (12/14)                   | 88% (157/179)                  |
| Hemispheric occlusion side (left) (n/N)                                        | 51% (103/202)              | 50% (98/196)                | 80% (12/15)                   | 48% (86/181)                   |
| Prestroke mRS (n/N)                                                            |                            |                             |                               |                                |
| 0                                                                              | 62% (125/202)              | 64% (125/196)               | 67% (10/15)                   | 64% (115/181)                  |
| 1                                                                              | 15% (30/202)               | 15% (30/196)                | 20% (3/15)                    | 15% (27/181)                   |
| 2                                                                              | 11% (22/202)               | 11% (22/196)                | 7% (1/15)                     | 12% (21/181)                   |
| 3                                                                              | 0% (1/202)                 | 1% (1/196)                  | 0% (0/15)                     | 1% (1/181)                     |
| Not determined                                                                 | 12% (24/202)               | 9% (18/196)                 | 7% (1/15)                     | 9% (17/181)                    |
| Median systolic blood pressure (mm Hg) (range)                                 | 146 (99, 220)              | 146 (99, 220)               | 154 (115, 208)                | 145 (99–220)                   |
| Median time from stroke onset to groin puncture (min) (range)                  | 238 (72, 714)              | 239 (72, 714)               | 280 (140, 450)                | 235 (72–714)                   |
| Median time from stroke onset to TIC1 2b or 3 (or final DSA run) (min) (range) | 282 (100, 800)             | 287 (100, 800)              | 322 (188, 483)                | 282 (100–800)                  |
| Stroke onset to successful revascularization categories (n/N)                  |                            |                             |                               |                                |
| 0–4.5 hr                                                                       | 46% (92/201)               | 45% (87/195)                | 20% (3/15)                    | 47% (84/180)                   |
| 4.5–8 hr                                                                       | 50% (101/201)              | 51% (100/195)               | 73% (11/15)                   | 49% (89/180)                   |
| ≥8 hr                                                                          | 4% (8/201)                 | 4% (8/195)                  | 7% (1/15)                     | 4% (7/180)                     |
| IV-tPA administered (vs contraindicated or bridging) (n/N)                     | 37% (75/202)               | 37% (73/196)                | 53% (8/15)                    | 36% (65/181)                   |
| Medical history                                                                |                            |                             |                               |                                |
| Diabetes mellitus                                                              | 15% (30/202)               | 15% (30/196)                | 40% (6/15)                    | 13% (24/181)                   |
| Myocardial disease                                                             | 18% (36/202)               | 18% (35/196)                | 27% (4/15)                    | 17% (31/181)                   |
| Systemic hypertension                                                          | 63% (127/202)              | 64% (126/196)               | 80% (12/15)                   | 63% (114/181)                  |
| Atrial fibrillation                                                            | 38% (77/202)               | 39% (77/196)                | 60% (9/15)                    | 38% (68/181)                   |
| Hyperlipidemia                                                                 | 39% (79/202)               | 39% (77/196)                | 40% (6/15)                    | 39% (71/181)                   |
| Smoker (past or current)                                                       | 19% (39/202)               | 19% (38/196)                | 7% (1/15)                     | 20% (37/181)                   |
| Previous ischemic stroke                                                       | 10% (21/202)               | 10% (19/196)                | 7% (1/15)                     | 10% (18/181)                   |
| Previous hemorrhagic stroke                                                    | 1% (3/202)                 | 2% (3/196)                  | 0% (0/15)                     | 2% (3/181)                     |
| Occlusion location                                                             |                            |                             |                               |                                |
| ICAT                                                                           |                            |                             |                               |                                |
| M1                                                                             | 18% (36/196)               | 18% (34/190)                | 20% (3/15)                    | 18% (31/175)                   |
| M2                                                                             | 66% (130/196)              | 66% (126/190)               | 53% (8/15)                    | 67% (118/175)                  |
| M3                                                                             | 14% (27/196)               | 14% (27/190)                | 27% (4/15)                    | 13% (23/175)                   |
| M3                                                                             | 2% (3/196)                 | 2% (3/190)                  | 0% (0/15)                     | 2% (3/175)                     |

**Note:**—ICAT indicates intracranial carotid T-type occlusion; n/N, group number/entire cohort number.

<sup>a</sup> Six patients had missing NIHSS scores at baseline and the most proximal occlusion location.
